# Supplementary material for: Quest for singlet fission of organic sulfur-containing systems in the higher lying singlet excited state: application prospects of anti-Kasha's rule
Source: Royal Society of Chemistry journal article supplement (doi:10.1039/d3cp00298e), 2023-01-01
Supplement: d3cp00298e1.pdf [file d3cp00298e1.pdf]

## Supporting Information

### **Quest on Singlet Fission of Organic Sulfur-Containing Systems in the Higher Lying Singlet Excited State: An Application Prospect of Anti- Kasha Rule**

*Chun-Hao Huang<sup>1</sup>, Chi-Chi Wu<sup>2</sup>, Elise Y. Li<sup>1\*</sup> and Pi-Tai Chou<sup>2\*</sup>*

<sup>1</sup>Department of Chemistry, National Taiwan Normal University, Taipei, 11677,  
Taiwan

<sup>2</sup>Department of Chemistry, National Taiwan University, Taipei, 10617, Taiwan

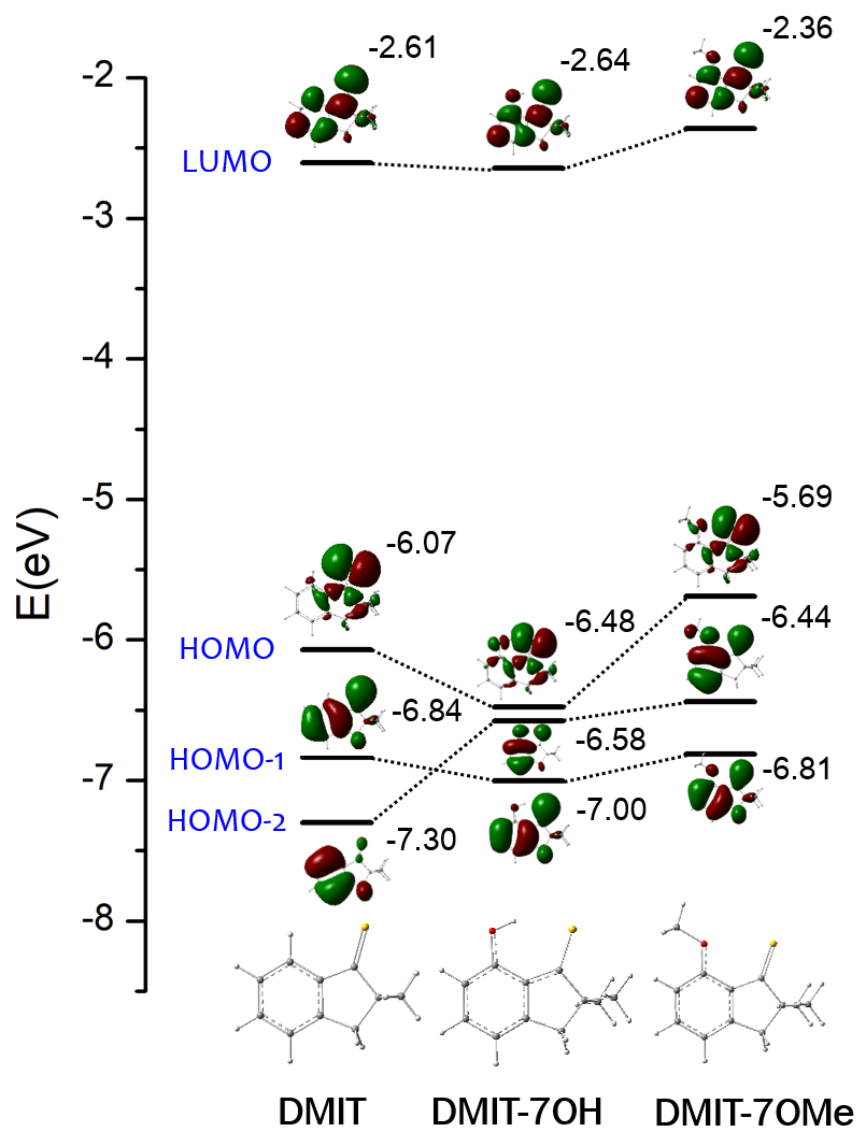

**Figure S1.** The molecular orbitals and their relative energy alignment at the optimized  $S_0$  geometry of **DMIT**, **DMIT-7OH** and **DMIT-7OMe**.

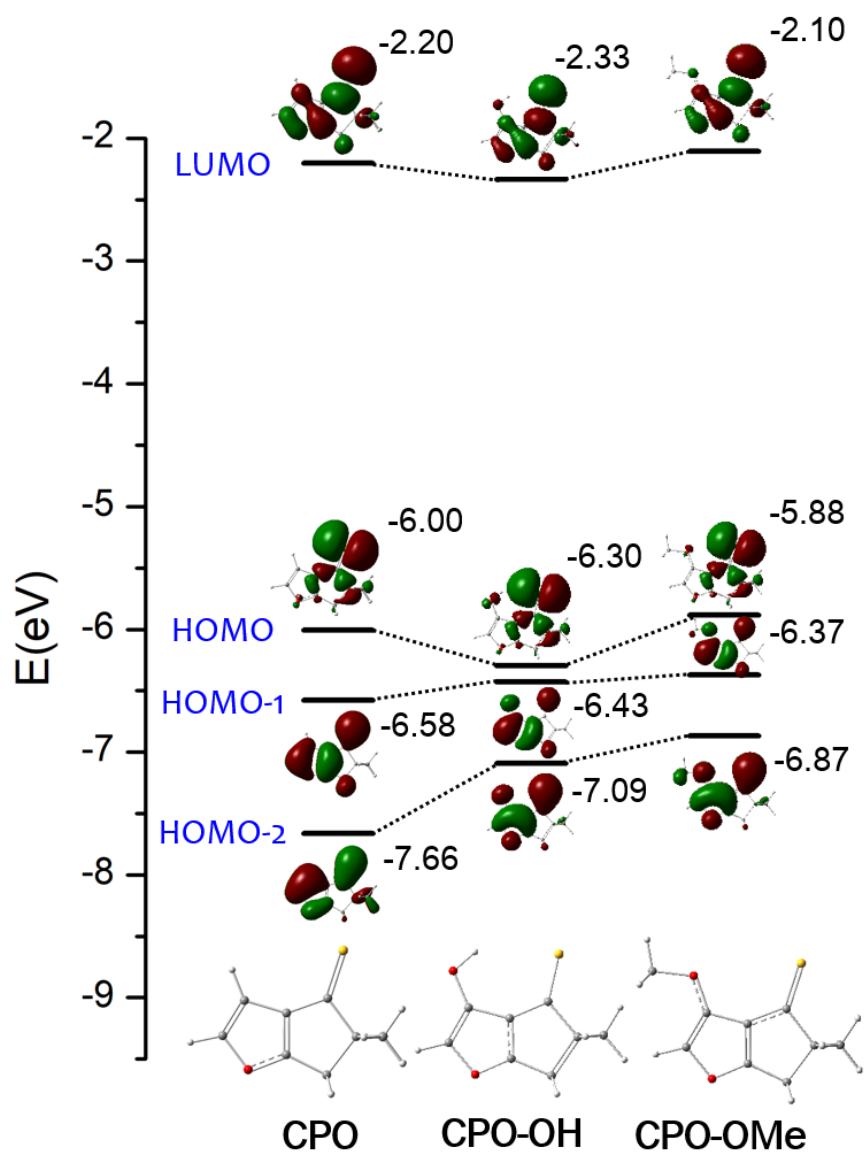

**Figure S2.** The molecular orbitals and their relative energy alignment at the optimized  $S_0$  geometry of CPO, CPO-OH and CPO-OMe.

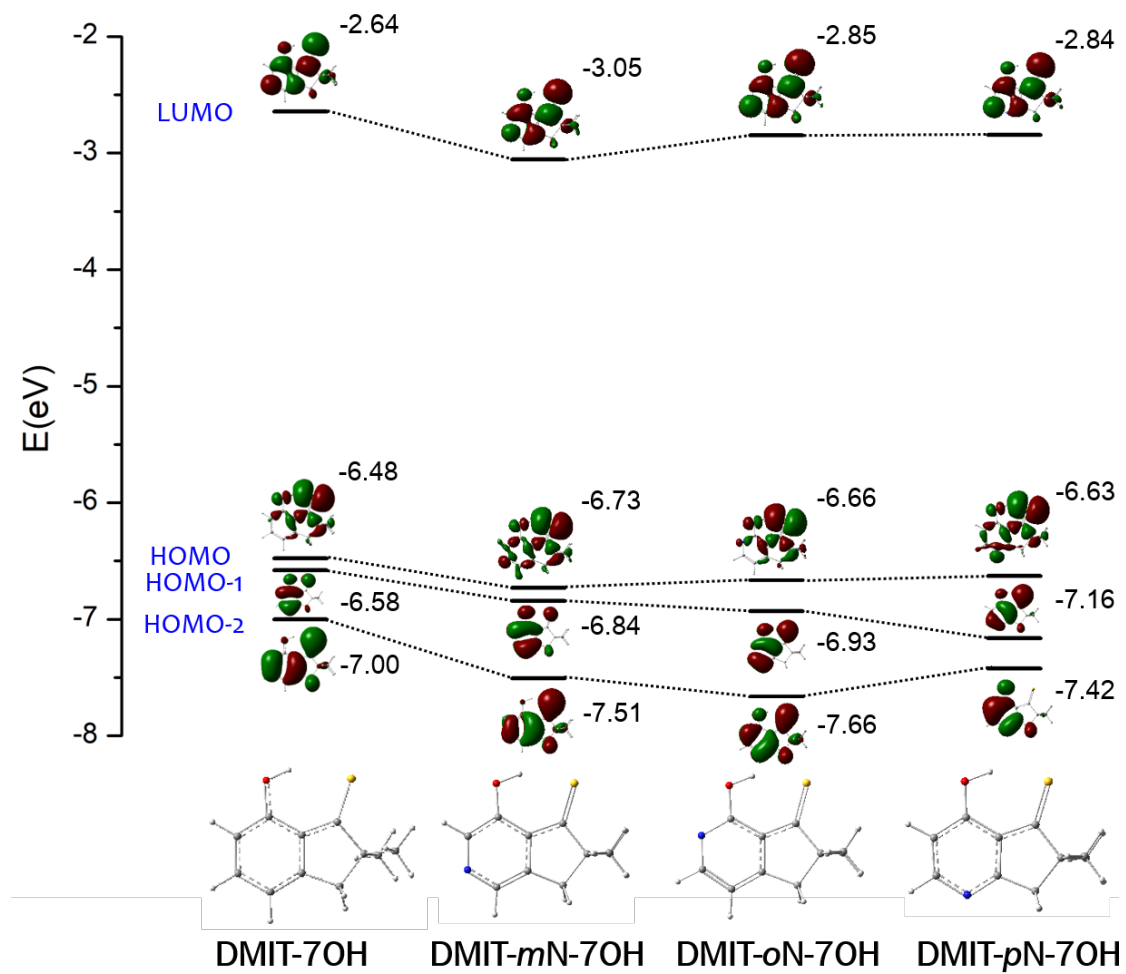

**Figure S3.** The molecular orbitals and their relative energy alignment at the optimized  $S_0$  geometry of **DMIT-7OH** and its derivatives with nitrogen substituted at *meta*-, *ortho*- or *para*- position.

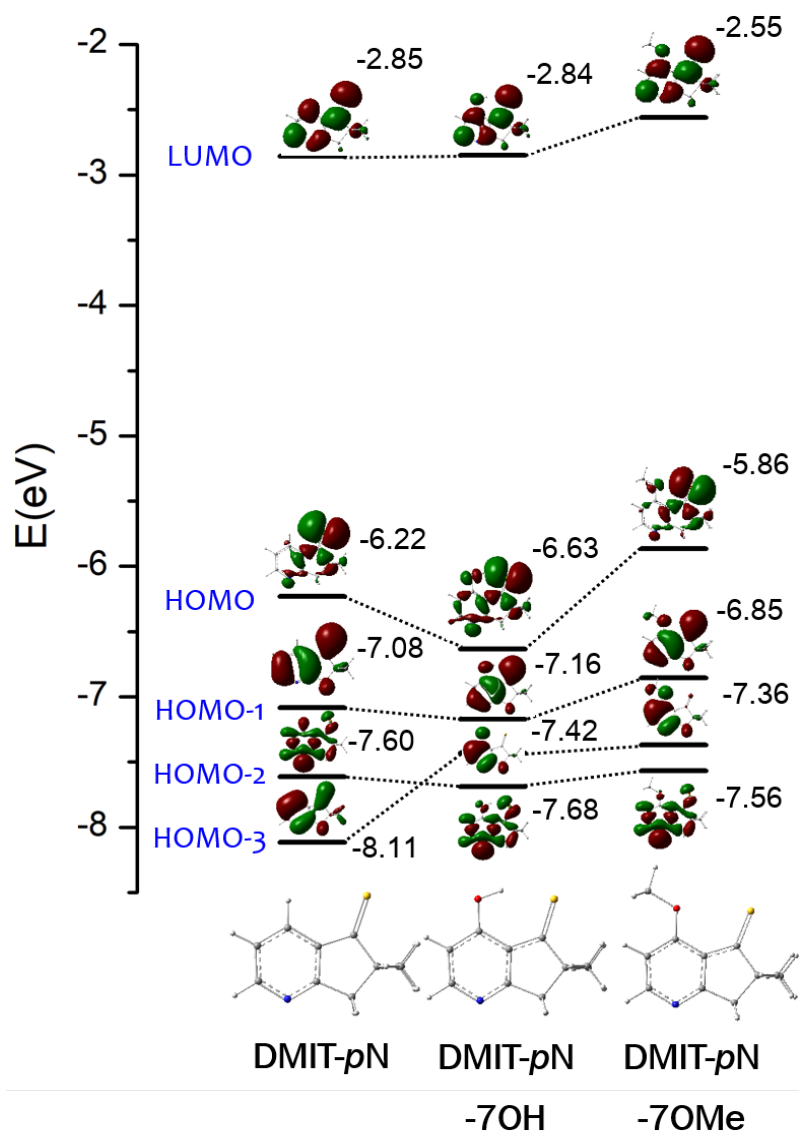

**Figure S4.** The molecular orbitals and their relative energy alignment at the optimized  $S_0$  geometry of the **DMIT** series.

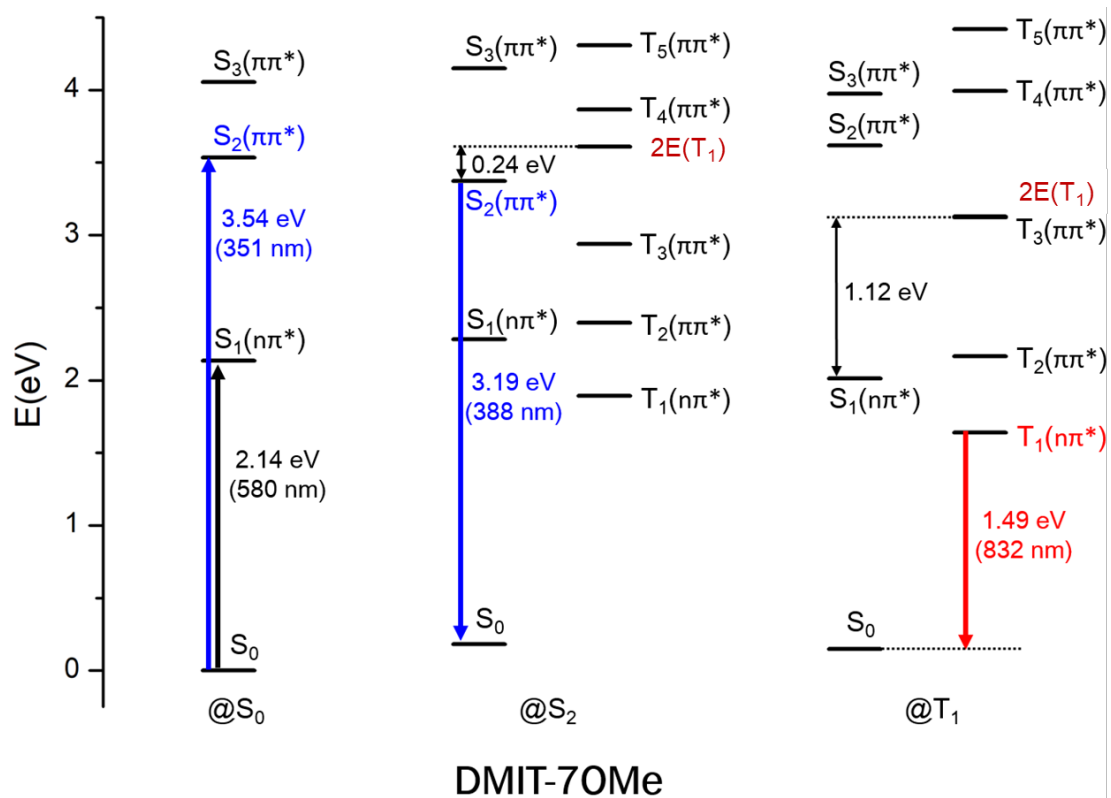

**Figure S5.** The detailed energy diagram of **DMIT-7OMe** at the optimized  $S_0$ ,  $S_2$  and  $T_1$  geometries.

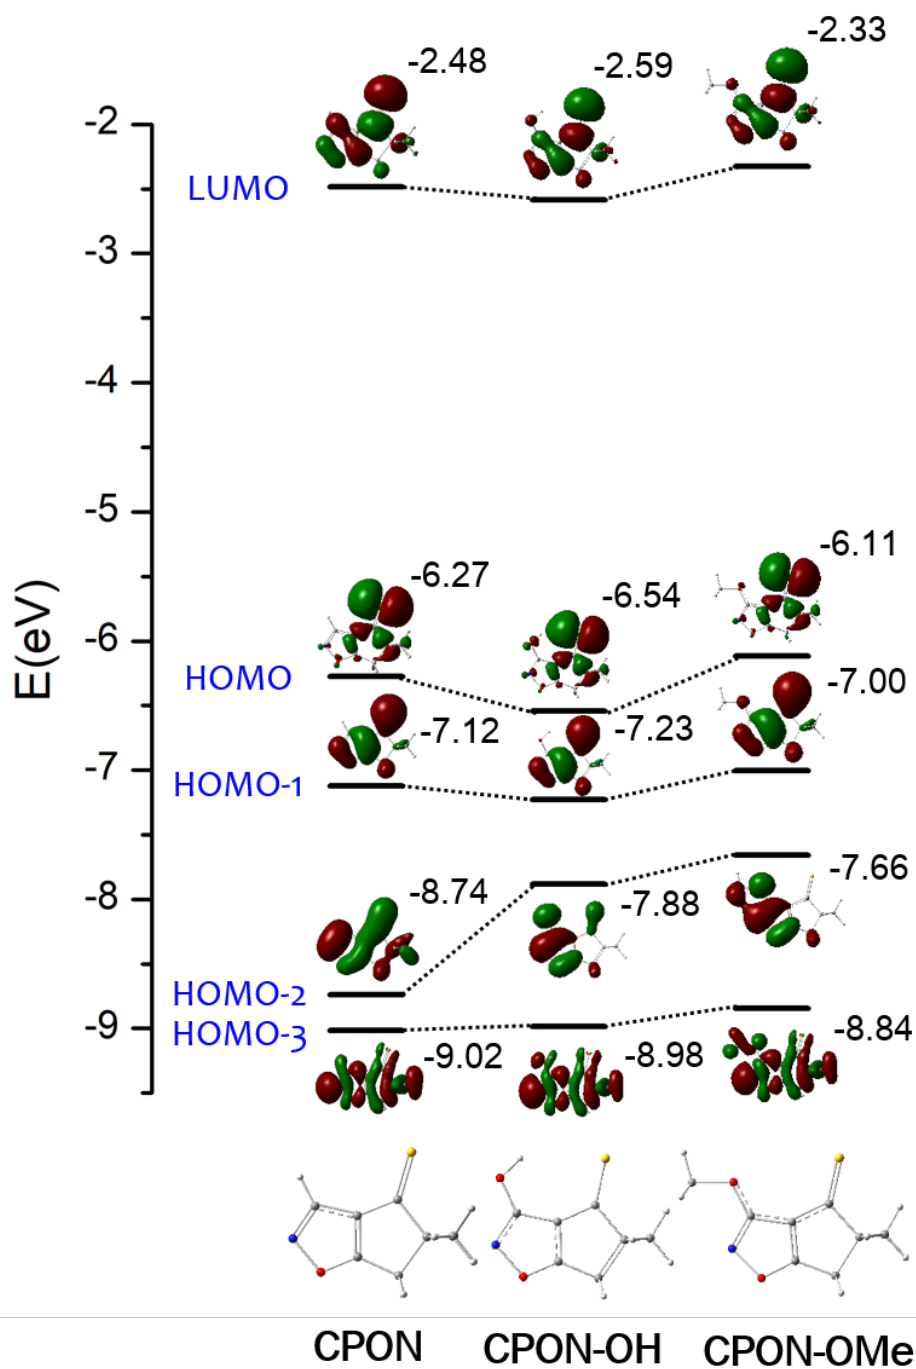

**Figure S6.** The molecular orbitals and their relative energy alignment at the optimized  $S_0$  geometry of the **CPO** series.

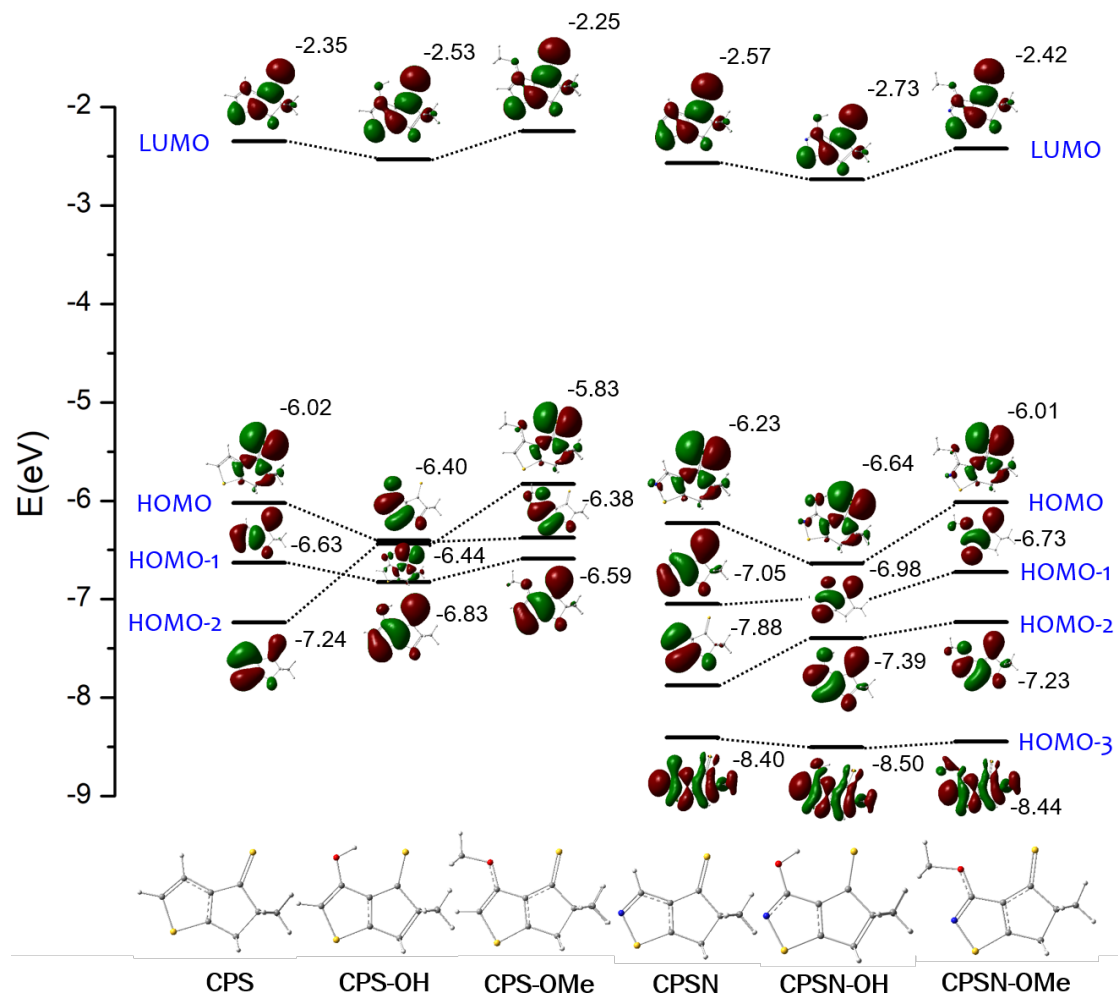

**Figure S7.** The molecular orbitals and their relative energy alignment at the optimized  $S_0$  geometry of the **CPS** series.



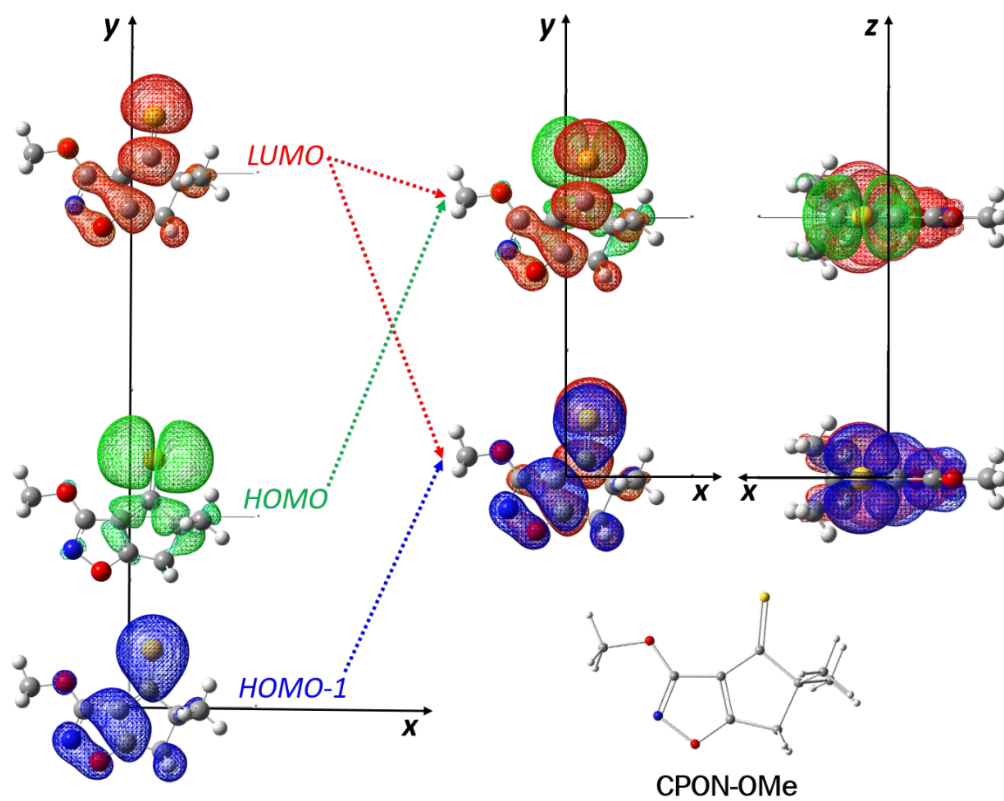

**Figure S8.** Top view and side view of different frontier molecular orbitals in CPON-OMe mapped together with total density isovalue = 0.02.

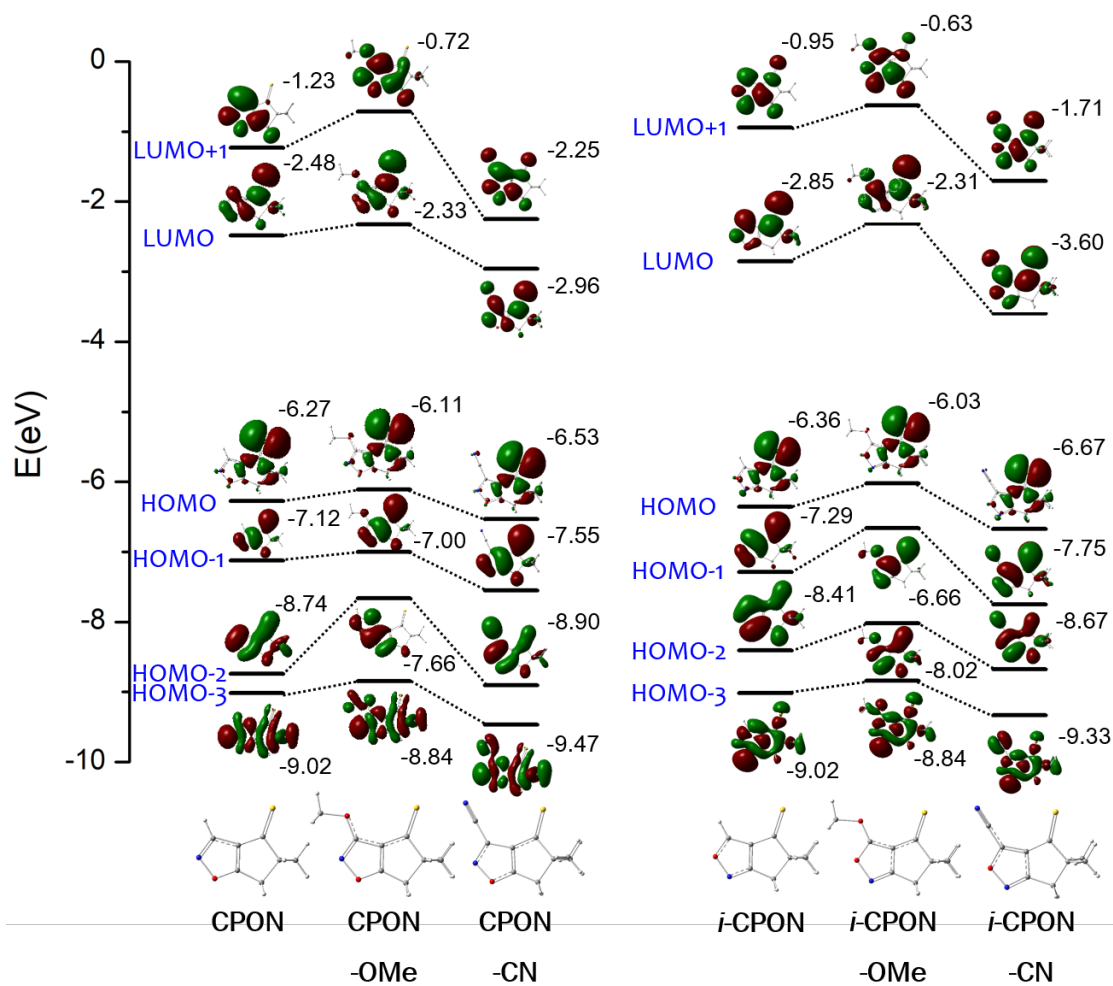

**Figure S9.** The molecular orbitals and their relative energy alignment at the optimized  $S_0$  geometry of the **CPON** and ***i-CPON*** series.

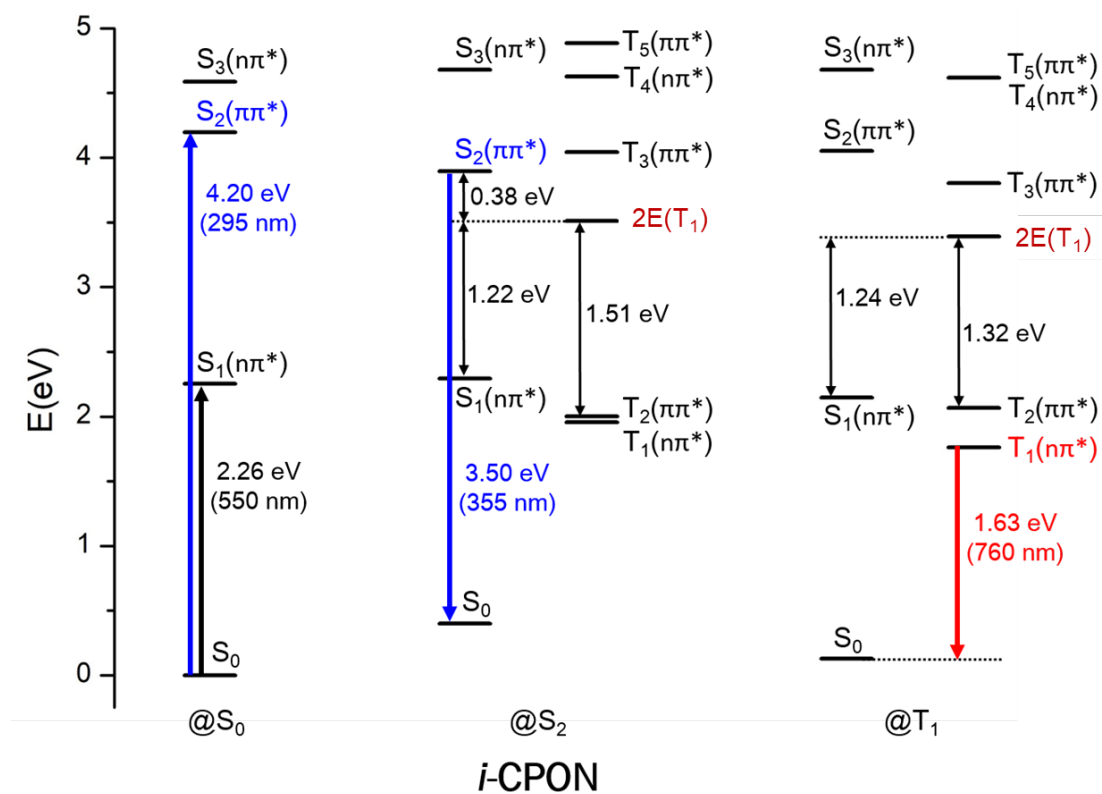

**Figure S10.** The detailed energy diagram at the optimized  $S_0$ ,  $S_2$  and  $T_1$  geometries of *i*-CPON.

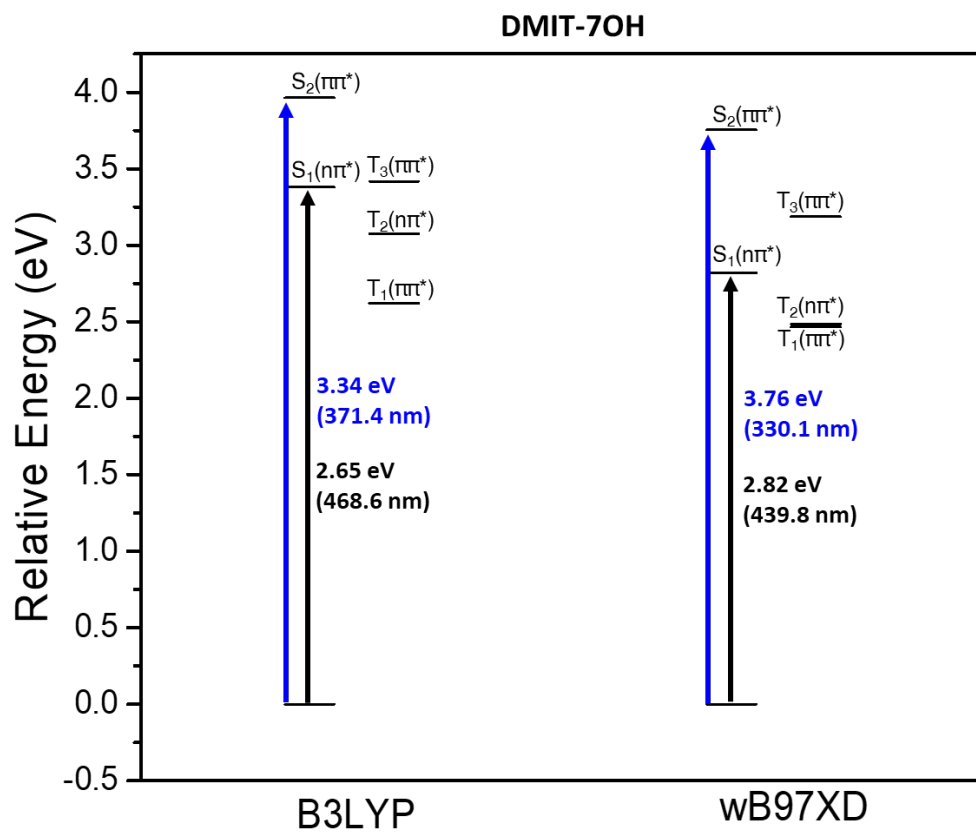

**Figure S11.** The energy diagram at the optimized  $S_0$  geometries of **DMIT-7OH** with b3lyp and  $\omega$ B97XD

**Table S1.** Calculated excitation data at the optimized S<sub>0</sub> geometry of the **DMIT** derivatives.

| Compound         | Excited state  | Energy (eV) | Contribution                     | Character | $\Delta E(S_2-S_1)$<br>E(eV) |
|------------------|----------------|-------------|----------------------------------|-----------|------------------------------|
| <b>DMIT</b>      | S <sub>1</sub> | 2.26        | H → L (0.99)                     | nπ*       | 1.63                         |
|                  | S <sub>2</sub> | 3.89        | H-1 → L (0.77)<br>H-2 → L (0.19) | ππ*       |                              |
|                  | T <sub>1</sub> | 1.65        | H → L (0.99)                     | nπ*       |                              |
|                  | T <sub>2</sub> | 1.95        | H-1 → L (0.94)                   | ππ*       |                              |
| <b>DMIT-7OH</b>  | S <sub>1</sub> | 2.65        | H → L (0.99)                     | nπ*       | 0.7                          |
|                  | S <sub>2</sub> | 3.34        | H-1 → L (0.93)                   | ππ*       |                              |
|                  | T <sub>1</sub> | 1.95        | H → L (0.97)                     | nπ*       |                              |
|                  | T <sub>2</sub> | 2.18        | H-1 → L (0.64)<br>H-2 → L (0.31) | ππ*       |                              |
| <b>DMIT-7OMe</b> | S <sub>1</sub> | 2.14        | H → L (0.99)                     | nπ*       | 1.4                          |
|                  | S <sub>2</sub> | 3.54        | H-1 → L (0.82)<br>H-2 → L (0.16) | ππ*       |                              |
|                  | T <sub>1</sub> | 1.49        | H → L (0.99)                     | nπ*       |                              |
|                  | T <sub>2</sub> | 2.02        | H-1 → L (0.86)<br>H-2 → L (0.1)  | ππ*       |                              |

---

|                       |                |                |                |                |      |     |
|-----------------------|----------------|----------------|----------------|----------------|------|-----|
| <b>DMIT-<i>p</i>N</b> | S <sub>1</sub> | 2.19           | H → L (0.99)   | nπ*            | 1.54 |     |
|                       | S <sub>2</sub> | 3.73           | H-2 → L (0.98) | σπ*            |      |     |
|                       | S <sub>3</sub> | 3.90           | H-1 → L (0.95) | ππ*            |      |     |
| <b>DMIT-<i>m</i>N</b> | S <sub>1</sub> | 2.48           | H → L (0.99)   | nπ*            | 0.73 |     |
|                       | <b>-7OH</b>    | S <sub>2</sub> | 3.21           | H-1 → L (0.97) |      | ππ* |
|                       |                | S <sub>3</sub> | 3.55           | H-3 → L (0.97) |      | σπ* |
| <b>DMIT-<i>o</i>N</b> | S <sub>1</sub> | 2.63           | H → L (0.99)   | nπ*            | 1    |     |
|                       | <b>-7OH</b>    | S <sub>2</sub> | 3.63           | H-1 → L (0.91) |      | ππ* |
|                       |                | S <sub>3</sub> | 3.9            | H-3 → L (0.98) |      | σπ* |
| <b>DMIT-<i>p</i>N</b> | S <sub>1</sub> | 2.60           | H → L (0.99)   | nπ*            | 1.23 |     |
|                       | <b>-7OH</b>    | S <sub>2</sub> | 3.83           | H-3 → L (0.98) |      | σπ* |
|                       |                | S <sub>3</sub> | 3.86           | H-2 → L (0.75) |      | ππ* |
|                       |                |                | H-1 → L (0.22) |                |      |     |
| <b>DMIT-<i>p</i>N</b> | S <sub>1</sub> | 2.12           | H → L (0.99)   | nπ*            | 1.85 |     |
|                       | <b>-7OMe</b>   | S <sub>2</sub> | 3.97           | H-1 → L (0.79) |      | ππ* |
|                       |                |                |                | H-2 → L (0.19) |      |     |
|                       | S <sub>3</sub> | 3.99           | H-3 → L (0.97) | σπ*            |      |     |

---

**Table S2.** Calculated excitation data at the optimized  $S_0$  geometry of the **CPO** series.

| Compound       | Excited state  | Energy (eV) | Contribution                     | Character  | $\Delta E(S_2-S_1)$<br>E(eV) |
|----------------|----------------|-------------|----------------------------------|------------|------------------------------|
| <b>CPO</b>     | S <sub>1</sub> | 2.53        | H → L (1)                        | $n\pi^*$   | 1.53                         |
|                | S <sub>2</sub> | 4.06        | H-1 → L (0.93)                   | $\pi\pi^*$ |                              |
|                | T <sub>1</sub> | 1.96        | H → L (0.99)                     | $n\pi^*$   |                              |
|                | T <sub>2</sub> | 2.16        | H-1 → L (0.91)                   | $\pi\pi^*$ |                              |
| <b>CPO-OH</b>  | S <sub>1</sub> | 2.7         | H → L (1)                        | $n\pi^*$   | 0.77                         |
|                | S <sub>2</sub> | 3.47        | H-1 → L (0.9)                    | $\pi\pi^*$ |                              |
|                | T <sub>1</sub> | 2.04        | H → L (0.96)                     | $n\pi^*$   |                              |
|                | T <sub>2</sub> | 2.15        | H-1 → L (0.59)<br>H-2 → L (0.34) | $\pi\pi^*$ |                              |
| <b>CPO-OMe</b> | S <sub>1</sub> | 2.5         | H → L (1)                        | $n\pi^*$   | 1.16                         |
|                | S <sub>2</sub> | 3.66        | H-1 → L (0.84)<br>H-2 → L (0.15) | $\pi\pi^*$ |                              |
|                | T <sub>1</sub> | 1.92        | H → L (0.99)                     | $n\pi^*$   |                              |
|                | T <sub>2</sub> | 2.17        | H-1 → L (0.64)<br>H-2 → L (0.36) | $\pi\pi^*$ |                              |
|                |                |             |                                  |            |                              |

---

|             |                |      |                |     |      |
|-------------|----------------|------|----------------|-----|------|
| <b>CPON</b> | S <sub>1</sub> | 2.5  | H → L (1)      | nπ* | 1.79 |
|             | S <sub>2</sub> | 4.29 | H → L+1 (1)    | nπ* |      |
|             | S <sub>3</sub> | 4.36 | H-1 → L (0.96) | ππ* |      |
|             | S <sub>6</sub> | 5.57 | H-3 → L (0.99) | σπ* |      |
| <b>CPON</b> | S <sub>1</sub> | 2.68 | H → L (1)      | nπ* | 1.67 |
| <b>-OH</b>  | S <sub>2</sub> | 4.35 | H-1 → L (0.88) | ππ* |      |
|             | S <sub>6</sub> | 5.45 | H-3 → L (0.99) | σπ* |      |
| <b>CPON</b> | S <sub>1</sub> | 2.50 | H → L (1)      | nπ* | 1.93 |
| <b>-OMe</b> | S <sub>2</sub> | 4.42 | H-1 → L (0.96) | ππ* |      |
|             | S <sub>7</sub> | 5.58 | H-3 → L (0.99) | σπ* |      |

---



**Table S3.** Calculated excitation data at the optimized  $S_0$  geometry of the **CPS** series.

| Compound       | Excited state  | Energy (eV) | Contribution                     | Character  | $\Delta E(S_2-S_1)$ E(eV) |
|----------------|----------------|-------------|----------------------------------|------------|---------------------------|
| <b>CPS</b>     | S <sub>1</sub> | 2.43        | H → L (0.99)                     | $n\pi^*$   | 1.54                      |
|                | S <sub>2</sub> | 3.97        | H-1 → L (0.83)<br>H-2 → L (0.14) | $\pi\pi^*$ |                           |
| <b>CPS-OH</b>  | S <sub>1</sub> | 2.69        | H-1 → L (0.99)                   | $n\pi^*$   | 0.48                      |
|                | S <sub>2</sub> | 3.16        | H → L (0.98)                     | $\pi\pi^*$ |                           |
| <b>CPS-OMe</b> | S <sub>1</sub> | 2.35        | H → L (0.99)                     | $n\pi^*$   | 1.07                      |
|                | S <sub>2</sub> | 3.42        | H-1 → L (0.98)                   | $\pi\pi^*$ |                           |

---

|                 |                |                |                |     |             |
|-----------------|----------------|----------------|----------------|-----|-------------|
| <b>CPSN</b>     | S <sub>1</sub> | 2.4            | H → L (0.99)   | nπ* | 1.61        |
|                 | S <sub>2</sub> | 4              | H → L+1 (0.99) | nπ* |             |
|                 | S <sub>3</sub> | 4.18           | H-1 → L (0.95) | ππ* |             |
|                 | S <sub>5</sub> | 4.9            | H-3 → L (0.99) | σπ* |             |
| <b>CPSN-OH</b>  | S <sub>1</sub> | 2.68           | H → L (0.99)   | nπ* | 1.01        |
|                 | S <sub>2</sub> | 3.69           | H-1 → L (0.82) | ππ* |             |
|                 |                |                | H-2 → L (0.17) |     |             |
| S <sub>5</sub>  | 4.82           | H-3 → L (0.97) | σπ*            |     |             |
| <b>CPSN-OMe</b> | S <sub>1</sub> | 2.35           | H → L (0.99)   | nπ* | <b>1.46</b> |
|                 | S <sub>2</sub> | 3.81           | H-1 → L (0.82) | ππ* |             |
|                 |                |                | H-2 → L (0.17) |     |             |
| S <sub>7</sub>  | 5.07           | H-3 → L (0.86) | σπ*            |     |             |

---

**Table S4.** Calculated excitation data at the optimized  $S_0$  geometry of the **CPON** and *i*-**CPON** series.

| Compound        | Excited state  | Energy (eV) | Contribution   | Character  | $\Delta E(S_2-S_1)$<br>E(eV) |
|-----------------|----------------|-------------|----------------|------------|------------------------------|
| <b>CPON</b>     | S <sub>1</sub> | 2.5         | H → L (1)      | $n\pi^*$   | 1.79                         |
|                 | S <sub>2</sub> | 4.29        | H → L+1 (1)    | $n\pi^*$   |                              |
|                 | S <sub>3</sub> | 4.36        | H-1 → L (0.96) | $\pi\pi^*$ |                              |
| <b>CPON-OMe</b> | S <sub>1</sub> | 2.5         | H → L (1)      | $n\pi^*$   | 1.93                         |
|                 | S <sub>2</sub> | 4.42        | H-1 → L (0.96) | $\pi\pi^*$ |                              |
|                 | S <sub>3</sub> | 4.57        | H-2 → L (0.99) | $\pi\pi^*$ |                              |
| <b>CPON-CN</b>  | S <sub>1</sub> | 2.34        | H → L (0.96)   | $n\pi^*$   | 1.17                         |
|                 | S <sub>2</sub> | 3.51        | H → L+1 (0.97) | $n\pi^*$   |                              |
|                 | S <sub>3</sub> | 4.22        | H-1 → L (0.9)  | $\pi\pi^*$ |                              |

---

|                      |                |                |                |                |      |     |
|----------------------|----------------|----------------|----------------|----------------|------|-----|
| <b><i>i</i>-CPON</b> | S <sub>1</sub> | 2.26           | H → L (0.99)   | nπ*            | 1.94 |     |
|                      | S <sub>2</sub> | 4.2            | H-1 → L (0.98) | ππ*            |      |     |
|                      | S <sub>3</sub> | 4.59           | H → L+1 (0.98) | nπ*            |      |     |
| <b><i>i</i>-CPON</b> | S <sub>1</sub> | 2.45           | H → L (0.99)   | nπ*            | 1.59 |     |
|                      | <b>-OMe</b>    | S <sub>2</sub> | 4.04           | H-1 → L (0.97) |      | ππ* |
|                      | S <sub>3</sub> | 4.64           | H → L+1 (0.99) | nπ*            |      |     |
| <b><i>i</i>-CPON</b> | S <sub>1</sub> | 1.93           | H → L (0.98)   | nπ*            | 1.99 |     |
|                      | <b>-CN</b>     | S <sub>2</sub> | 3.92           | H-1 → L (0.99) |      | ππ* |
|                      | S <sub>3</sub> | 4.02           | H → L+1 (0.97) | nπ*            |      |     |

---

**Table S5.** Theoretical data of the designed systems in this study at the optimized S<sub>0</sub>, S<sub>2</sub> and T<sub>1</sub> geometries and the experimental excitation data of the cofacial perylene dimer.

<sup>a</sup> calculated from E(S<sub>2</sub>)@S<sub>0</sub> (eV) - 2E(T<sub>1</sub>)@T<sub>1</sub> (eV)

| Compound                               | <b>DMIT-<i>p</i>N</b> | <b>CPON</b> | <b><i>i</i>-CPON</b> | cofacial perylene  |
|----------------------------------------|-----------------------|-------------|----------------------|--------------------|
|                                        | <b>-7OMe</b>          | <b>-OMe</b> |                      | dimer <sup>1</sup> |
| E(S <sub>2</sub> )@S <sub>0</sub> (eV) | 3.97                  | 4.42        | 4.2                  | 4.96               |
| E(T <sub>1</sub> )@T <sub>1</sub> (eV) | 1.49                  | 1.91        | 1.63                 | 1.51               |
| Heat loss <sup>a</sup>                 | 0.99                  | 0.6         | 0.94                 | <b>1.94</b>        |

**Table S6.** Spin-orbit couplings calculated as root mean squares ( $\text{cm}^{-1}$ ) at  $S_2$ -optimized structure of DMIT-derivatives

| $\langle S   H_{\text{so}}   T \rangle$ | $T_3 (\Delta E_{\text{ST}})^{\text{a}}$ | $T_4 (\Delta E_{\text{ST}})$ | $T_5 (\Delta E_{\text{ST}})$ | $T_6 (\Delta E_{\text{ST}})$ |
|-----------------------------------------|-----------------------------------------|------------------------------|------------------------------|------------------------------|
| DMIT                                    | 0.67 (0.21)                             | 0.92 (-0.22)                 | 0.62 (-0.96)                 | 13.34 (-1.00)                |
| DMIT-7OMe                               | 2.28 (0.43)                             | 1.42 (-0.49)                 | 2.84 (-0.93)                 | 11.10 (-1.35)                |
| DMIT-pN                                 | 1.91 (0.14)                             | 18.21 (-0.88)                | 1.16 (-1.24)                 | 10.44 (-1.28)                |
| DMIT-pN-7OMe                            | 1.51 (1.79)                             | 9.34 (1.27)                  | 12.02 (0.67)                 | 1.08 (0.41)                  |
| CPO                                     | 23.32(-0.23)                            | 13.30(-1.01)                 | 24.24(-1.69)                 | 4.59(-2.41)                  |
| CPO-OMe                                 | 2.11 (0.30)                             | 2.08 (-0.45)                 | 13.3 (0.94)                  | 7.76 (-1.35)                 |
| CPON-OMe                                | 0.54 (0.30)                             | 0.30 (-0.32)                 | 8.50 (-1.64)                 | 17.70 (-1.68)                |
| <i>i</i> -CPON                          | 0.26 (-0.26)                            | 117.62 (-0.83)               | 0.12 (-1.06)                 | 87.61 (-1.23)                |

<sup>a</sup>  $\Delta E_{\text{ST}} = (E_{S_2} - E_{T_n})$  at  $S_2$ -optimized structure

**Table S7.** Calculated excitation data with  $\omega$ B97XD at the optimized geometries of the DMIT-7OH series.

| Structure                 | Excited state  | Energy (eV) | Contribution               | Character  | $\Delta E(S_2-S_1)$<br>E(eV) |
|---------------------------|----------------|-------------|----------------------------|------------|------------------------------|
|                           | S <sub>1</sub> | 2.82        | H-1 $\rightarrow$ L (0.94) | $n\pi^*$   |                              |
|                           | S <sub>2</sub> | 3.76        | H $\rightarrow$ L (0.96)   | $\pi\pi^*$ |                              |
|                           | T <sub>1</sub> | 2.47        | H-2 $\rightarrow$ L (0.39) | $\pi\pi^*$ |                              |
| <b>@S<sub>0</sub>-opt</b> |                |             | H-1 $\rightarrow$ L (0.09) | $n\pi^*$   | 0.94                         |
|                           |                |             | H $\rightarrow$ L (0.46)   | $\pi\pi^*$ |                              |
|                           | T <sub>2</sub> | 2.48        | H-2 $\rightarrow$ L (0.07) | $\pi\pi^*$ |                              |
|                           |                |             | H-1 $\rightarrow$ L (0.85) | $n\pi^*$   |                              |
|                           | S <sub>1</sub> | 2.58        | H $\rightarrow$ L (0.95)   | $n\pi^*$   |                              |
|                           | S <sub>2</sub> | 3.75        | H-1 $\rightarrow$ L (0.95) | $\pi\pi^*$ |                              |
|                           | T <sub>1</sub> | 2.22        | H-2 $\rightarrow$ L (0.08) | $\pi\pi^*$ |                              |
| <b>@S<sub>1</sub>-opt</b> |                |             | H-1 $\rightarrow$ L (0.17) | $\pi\pi^*$ | 1.17                         |
|                           |                |             | H $\rightarrow$ L (0.69)   | $n\pi^*$   |                              |
|                           | T <sub>2</sub> | 2.28        | H-2 $\rightarrow$ L (0.30) | $\pi\pi^*$ |                              |
|                           |                |             | H-1 $\rightarrow$ L (0.39) | $\pi\pi^*$ |                              |
|                           |                |             | H $\rightarrow$ L (0.25)   | $n\pi^*$   |                              |
|                           | S <sub>1</sub> | 2.85        | H-1 $\rightarrow$ L (0.96) | $n\pi^*$   |                              |
|                           | S <sub>2</sub> | 3.38        | H $\rightarrow$ L (0.98)   | $\pi\pi^*$ |                              |
| <b>@S<sub>2</sub>-opt</b> | T <sub>1</sub> | 2.3         | H-2 $\rightarrow$ L (0.40) | $\pi\pi^*$ | 0.53                         |
|                           |                |             | H $\rightarrow$ L (0.56)   | $\pi\pi^*$ |                              |
|                           | T <sub>2</sub> | 2.54        | H-1 $\rightarrow$ L (0.95) | $n\pi^*$   |                              |

## References

- (1) W. Ni, G. G. Gurzadyan, J. Zhao, Y. Che, X. Li, and L. Sun, *J. Phys. Chem. Lett.* **2019**, *10*, 2428-2433.
